1     **An integrative approach unveils a distal encounter site for rPTPε and phospho-**  
2                                     **Src complex formation**

3  
4     Nadendra EswarKumar<sup>1</sup>, Cheng-Han Yang<sup>1,2</sup>, Sunilkumar Tewary<sup>1</sup>, Yi-Qi Yeh<sup>3</sup>,  
5     Hsiao-Ching Yang<sup>2\*</sup>, Meng-Chiao Ho<sup>1,4\*</sup>

6  
7     <sup>1</sup>Institute of Biological Chemistry, Academia Sinica, 128 Academia Road Sec. 2,  
8     Nankang, Taipei, 115, Taiwan

9     <sup>2</sup>Department of Chemistry, Fu Jen Catholic University, New Taipei City 24205, Taiwan

10    <sup>3</sup>National Synchrotron Radiation Research Center, Hsin-Chu 300, Taiwan

11    <sup>4</sup>Institute of Biochemical Sciences, National Taiwan University, Taipei 106, Taiwan

12  
13    \*Corresponding Author's e-mail address

14    Meng-Chiao Ho E-mail: [joeho@gate.sinica.edu.tw](mailto:joeho@gate.sinica.edu.tw)

15    Hsiao-Ching Yang Email: [hcyang\\_chem@mail.fju.edu.tw](mailto:hcyang_chem@mail.fju.edu.tw)

16  
17  
18    Keyword: protein tyrosine phosphatase, small angle X-ray scattering, Src, protein:  
19    phospho-protein complex

20

21 **Abstract**

22 Protein tyrosine phosphatase: phospho-protein complex structure determination, which  
23 requires to understand how specificity is achieved at the protein level remains a  
24 significant challenge for protein crystallography and cryoEM due to the transient nature  
25 of binding interactions. Using rPTP $\epsilon$ D1 and phospho-SrcKD as a model system, we  
26 established an integrative workflow involving protein crystallography, SAXS and  
27 pTyr-tailored MD simulations to reveal the complex formed between rPTP $\epsilon$ D1 and  
28 phospho-SrcKD, revealing transient protein–protein interactions distal to the active site.  
29 To support our finding, we determined the associate rate between rPTP $\epsilon$ D1 and  
30 phospho-SrcKD and showed that a single mutation on rPTP $\epsilon$ D1 disrupts this transient  
31 interaction, resulting in the reduction of association rate and activity. Our simulations  
32 suggest that rPTP $\epsilon$ D1 employs a binding mechanism involving conformational change  
33 prior to the engagement of cSrcKD. This integrative approach is applicable to other  
34 PTP: phospho-protein complex determination and is a general approach for elucidating  
35 transient protein surface interactions.

## 36 **Introduction**

37 Protein-tyrosine phosphorylation is a reversible post-translational modification that  
38 regulates cellular signaling in eukaryotes. Protein-tyrosine phosphorylation levels in  
39 the cell are balanced by counteracting activities between protein-tyrosine kinases  
40 (PTKs) and protein-tyrosine phosphatases (PTPs)<sup>1</sup>. Aberrations in the regulation of  
41 protein-tyrosine phosphorylation are often associated with disease states such as  
42 arthritis, diabetes and cancer<sup>1-6</sup>. Crystallographic and peptide-binding studies of various  
43 PTPs such as PTP1B, SHP-1, SHP-2, rPTP $\epsilon$  and rPTP $\alpha$  have revealed detailed  
44 mechanisms of substrate specificity/recognition at the active site<sup>7-12</sup>. The hallmark of  
45 previous structural studies is that the cysteine-dependent active site typically features a  
46 small, deep pocket to accommodate the phosphorylated tyrosine (pTyr) side chain and  
47 a relatively flat outer surface for the adjacent residues<sup>13</sup>. The interactions between the  
48 pTyr side chain and the active-site pocket provide most of the binding energy and drive  
49 the binding event. However, previous studies of the rPTP $\alpha$  phosphatase domain  
50 (rPTP $\alpha$ D1) and pTyr peptides with sequences derived from its physiological substrate,  
51 Src, displayed an unlikely weak affinity, with Michaelis constants ( $K_M$ ) in the  
52 millimolar range- much higher than the physiological concentration<sup>10</sup>. Although the D2  
53 domain of rPTP $\alpha$  and SH2 domain of Src also play crucial roles in rPTP $\alpha$ : Src complex  
54 formation<sup>9,14,15</sup>, studies of ERK kinase and metalloproteinase have shown that  
55 additional protein-protein interaction (also known as encounter interface or exosites)  
56 far from the active site can facilitate substrate recognition<sup>16</sup>. Currently, there is only  
57 one PTP: phospho-protein complex structure in protein data bank (PDB), but it  
58 represents a noncatalytic mode of interactions and cannot reveal additional protein-  
59 protein interactors<sup>17</sup>. Therefore, the corresponding encounter interface in PTPs  
60 remained largely unexplored as no functional PTP: phospho-protein complex structure

61 has yet been determined.

62 Herein, we report the first rPTP $\epsilon$ D1: phospho-SrcKD complex structures by integrating

63 experimental and computational approaches that is applicable to other PTP complexes.

64 In brief, the experimental SAXS data guides rigid-body docking to form the initial

65 complex, which provides a defined spatial orientation between rPTP $\epsilon$ D1 and phospho-

66 SrcKD. This approach effectively reduces the computational time and resource required

67 by multiscale MD simulations in searching of protein-protein binding ensemble

68 structures<sup>18-21</sup>. The following pTyr-tailored MD simulation optimized the spatial

69 arrangement of the two protein molecules and the encounter interface. The key residues

70 and trajectory snapshots of protein complex formation are further revealed by steered

71 MD simulations and umbrella sampling.

72 Our complex structure revealed an encounter interface, which greatly enhance the

73 formation of a catalytically competent complex. A single site was replaced on the

74 encounter interface, designed to partially disrupt charge-charge interactions, resulting

75 in a seven-fold reduction of the association rate  $k_{on}$ , and a 30% reduction of PTP $\epsilon$

76 phosphatase activity towards phospho-SrcKD but not towards pNPP, a pTyr substrate

77 analog. Our structural analyses further suggest that a conformational selection

78 mechanism plays an initial role in molecular recognition between rPTP $\epsilon$ D1 and SrcKD.

79

## 80 **Results**

### 81 **Production of stable rPTP $\epsilon$ D1: phospho-SrcKD complex**

82 In the present study, we focused on the interaction between the D1 domain of rPTP $\epsilon$

83 (rPTP $\epsilon$ D1) which possesses phosphatase activity and its target, the kinase domain of

84 Src (SrcKD) where the C-terminal pTyr527 is dephosphorylated. A known catalytically

85 inactive and substrate-trapping mutation of rPTP $\epsilon$ D1-C335S was used to obtain a stable

86 rPTP $\epsilon$ D1: phospho-SrcKD complex. CSK, a known kinase of the Src family, was used  
87 to phosphorylate SrcKD *in vitro*<sup>22</sup>. The SrcKD double variant, K295M/Y416F  
88 substituted in ATP binding and activation residues, respectively, was produced to  
89 prevent additional auto-phosphorylation on Src<sup>23,24</sup>. The CSK treated SrcKD was  
90 pooled with rPTP $\epsilon$ D1 for complex formation and was further purified by size-exclusion  
91 chromatography (SEC). The purified rPTP $\epsilon$ D1: phospho-SrcKD complex was co-  
92 eluted at a volume that was distinct from that of the uncomplexed rPTP $\epsilon$ D1 and SrcKD  
93 (Fig. 1a and 1b). The ability to be co-eluted in the SEC suggests that the phospho-  
94 SrcKD forms a stable heterodimeric complex. Our analytical ultracentrifugation (AUC)  
95 result shows that both uncomplexed rPTP $\epsilon$ D1 and SrcKD show a single peak with an  
96 S20 value of  $\sim 3$  whereas rPTP $\epsilon$ D1: phospho-SrcKD complex shows an additional peak  
97 with S20 value  $> 4$ , indicating stable heterodimeric complex formation and consistent  
98 with SEC experiment (Fig. 1c).

#### 99 **Distinct binding behavior of rPTP $\epsilon$ D1 towards SrcKD and peptide**

100 Previous findings revealed that rPTP $\alpha$  has a substantially weaker binding affinity (in  
101 the low mM range) toward the pTyr Src peptide<sup>10</sup>. As rPTP $\epsilon$  is a homolog of rPTP $\alpha$ ,  
102 SEC showing that rPTP $\epsilon$ D1 does not co-elute with pTyr Src peptide is similarly a sign  
103 of weak or transient binding between rPTP $\epsilon$ D1 and Src peptide (Fig. 1d). As we  
104 observed stable rPTP $\epsilon$ D1: phospho-SrcKD complex formation (Fig 1a), we  
105 hypothesized a non-peptide mediated binding regime and the existence of additional  
106 encounter interfaces (exosite) between rPTP $\epsilon$ D1 and SrcKD.

#### 107 **Docking model by SAXS and MD simulation**

108 The combination of multiscale MD simulations with solution SAXS is advantageous  
109 as MD simulations allow conformational arrangement while SAXS experiments  
110 provide information about overall shape which can effectively reduce the time-

111 consuming simulation process in searching of protein-protein binding ensembles.  
112 SAXS (with a  $q$  value ranging from 0.009 to  $0.2 \text{ \AA}^{-1}$ ) was used to determine a molecular  
113 envelope for the rPTP $\epsilon$ D1: phospho-SrcKD complex, indicating an elongated particle  
114 in solution with a radius of gyration ( $R_g$ ) of  $29.4 \text{ \AA}$  and a maximum intramolecular  
115 distance,  $D_{\max}$ , of  $91.1 \text{ \AA}$  (Fig. 1e, 1f, 2a and 2b and Table. S1). The calculated low-  
116 resolution envelope had adequate space to fit the complex molecules (Fig. 1f). In  
117 addition, the rigid-body docking complex was generated by CORAL using crystal  
118 structures of rPTP $\epsilon$ D1, (PDB ID: 2JJD) and SrcKD (PDB ID: 2SRC). One of the best  
119 fit CORAL docking models with  $\chi^2$  value of 4.1 showed a docking complex with tail-  
120 to-tail relative orientation (Fig. 2a). In this complex, there were no lysine or arginine  
121 residues found proximal to the encounter (intermolecular) interface. Further  
122 examination found that the complex cannot be cross-linked by amine-to-amine  
123 crosslinkers, such as glutaraldehyde and bis-sulfosuccinimidyl suberate (BS3),  
124 supporting this docking model.

125 To create a pTyr bound docking model, we manually moved the flexible pTyr region  
126 (Asp518-Gln534) toward rPTP $\epsilon$ D1 based on geometry restraints and positioned  
127 pTyr527 into the active-site of rPTP $\epsilon$ D1 based on the pTyr-peptide bound PTP1B  
128 crystal structure (PDB ID: 1G1H)<sup>25</sup>. The ability of the C-terminal pTyr527 to reach the  
129 rPTP $\epsilon$ D1 active site by moving only the flexible C-terminus implies that our tail-to-tail  
130 docking model is in a functionally competent state, allowing rPTP $\epsilon$ D1 to  
131 dephosphorylate pTyr527 of SrcKD. The missing N-terminal residues (four residues in  
132 rPTP $\epsilon$ D1 and 27 residues in SrcKD) were added to the CORAL docking model by  
133 RosettaCommons. By keeping pTyr527 bound in the active site and the N-terminus  
134 flexible, the docking model was optimized by BIBLOMD with an improved  $\chi^2$  value  
135 of 2.5 (Fig. 2d and S1). However, close inspection of the BIBLOMD model revealed

136 that Glu486 and Glu489 of SrcKD were surrounded by a negatively charged surface on  
137 rPTPεD1, indicating an unfavorable repulsive contact in the encounter interface (Fig.  
138 S2). Application of MD relaxation allowed these unfavorable repulsive contacts to be  
139 resolved into favorable attractive interactions in the encounter interface (Fig. 2d, S1  
140 and S2). Compared to the crystal structure of uncomplexed rPTPεD1, the most apparent  
141 difference occurs in the N-terminal helices (residues 121-128 and 136-141) of rPTPεD1  
142 that are more extended and undergo minor loop-helix-loop rearrangement. Those  
143 regions are distal to the encounter interface and there are no conformational changes of  
144 helical backbone observed in the vicinity of the complex interface of rPTPεD1. The  
145 side chain Arg220 present in the encounter interface rotates to the more solvent exposed  
146 side, providing an attractive favorable contact in the interface (Fig S1). In the case of  
147 SrcKD, a minor rearrangement of the backbone of one helix (residue 469-477) is  
148 observed. The major change is that the loop including Glu486 flips a distance of 4.5 Å  
149 toward the encounter interface, contributing to a favorable attraction in the encounter  
150 complex interface. Overall, the MD relaxation complex forms additional rPTPεD1-  
151 R220: SrcKD-E486 and rPTPεD1-K237: SrcKD-D518 interactions with  $\chi^2$  values  
152 improved from 2.5 to 1.6, indicating a better fit to the experimental SAXS data (Fig.  
153 2c, and Table S2).

#### 154 **Mapping the interactions during complex formation with a free-energy approach**

155 Typically, searching protein dissociation or association pathway requires long-  
156 timescale MD simulations combined with an additional modeling approach<sup>26</sup>, however,  
157 it is not easy to reach its convergence criterion. In contrast, our SAXS-based complex  
158 structure can quickly provides a reasonable initial complex model for further MD  
159 optimization.

160 Initially, MD simulation with umbrella sampling failed to assess the pathway trajectory

161 owing to the strong attractive interactions between pTyr527 of SrcKD and the rPTPεD1  
162 active site. Consequently, the complex remained in the bound form and resulted in  
163 significant rotation of the protein molecules (Fig. S3). Hence, the unphosphorylated  
164 form of SrcKD was purposely used for the following MD simulation.  
165 The simulated reaction coordinate was selected based on the center-of-mass (COM)  
166 between rPTPεD1 and SrcKD. In the dissociation process, the encounter interface starts  
167 to disrupt at a COM distance of 49 Å and vanish at 55 Å (Fig. 3a). It suggests that the  
168 interface interaction of the complex started dissociating at COM distance of 49 Å and  
169 completely dissociated at 55 Å. To understand and evaluate the contribution of key  
170 residues, we decomposed the free energy of two charge-charge residue pairs, R220:  
171 E486 and K237: D518. The energy decomposition results suggested both residue pairs  
172 play roles in binding, which is consistent with the optimized MD model (Fig. 3b). In  
173 addition, our results illustrate that the rPTPεD1-R220: SrcKD-E486 pair show a larger  
174 difference between the bound state and the unbound state whereas the rPTPεD1-K237:  
175 SrcKD-D518 pair displays a minor change, indicating that the R220:E486 interaction  
176 plays a crucial role in complex formation.  
177 Next, to demonstrate the corresponding intermediate structural changes from the  
178 unbound to bound state, MD simulation in the association direction was performed. The  
179 starting model was derived from the previous MD pathway trajectory at the COM  
180 distance of 56.5 Å. To simulate the process of complex formation, proteins were slowly  
181 moved toward each other in the bulk solvent environment. In the unbound state, the  
182 proteins were very dynamic without any close contact (Fig. 3c). At the intermediate  
183 state, the complex gains electrostatic attraction between rPTPεD1-R220 and SrcKD-  
184 E486 (Fig. 3d). At the next stage of complex formation, an additional interaction is  
185 formed between rPTPεD1-K237 and SrcKD-D518 (Fig. 3e). SrcKD-D518 is only eight



186 amino acid residues away from pTyr527 in the primary structure, so this intermolecular  
187 arrangement brings SrcKD-pTyr527 close to the rPTP $\epsilon$ D1 active site (Fig. 3f). The  
188 identified interactions along the association pathway of rPTP $\epsilon$ D1: SrcKD complex is  
189 highly consistent with the dissociation process results that R220:E486 and K237:D518  
190 pairs play roles in the complex formation

### 191 ***In vitro* validation of the role of rPTP $\epsilon$ -D1-R220 in complex formation**

192 To further validate the role of rPTP $\epsilon$ D1-R220: SrcKD-E486 interaction, a repulsive  
193 mutant rPTP $\epsilon$ D1-R220E was generated. The SEC and AUC experiments showed that  
194 the rPTP $\epsilon$ D1-R220E failed to form a stable complex with phospho-SrcKD (Fig. 4a and  
195 4b). This result supports the model that the encounter interface of R220: E486 is crucial  
196 for the stabilization of the rPTP $\epsilon$ D1-R220: phospho-SrcKD complex. The previous  
197 study of PTP1B shows disruption of charge-charge interactions within the pY-6 to  
198 pY+5 region of phospho-peptides decreases binding constants by 2 to 18 fold<sup>27</sup>. Our  
199 binding experiment showed that the R220E variant has a 7.8-fold reduction in  
200 association rate with phospho-SrcKD with  $k_{on}$  of 128 M<sup>-1</sup>s<sup>-1</sup> and an estimated  $K_D$  of 257  
201  $\mu$ M compared to wild-type rPTP $\epsilon$ D1 with  $k_{on}$  of 998 M<sup>-1</sup>s<sup>-1</sup> and  $K_D$  of 34  $\mu$ M (Fig. 4c  
202 and 4d). This relative slow association rate (well below the diffusion-controlled rate)  
203 indicates that the binding event is limited by conformational rearrangement<sup>28</sup>.

204 Finally, we compared the phosphatase activity of the rPTP $\epsilon$ D1 wild-type and R220E  
205 variant using pNPP and phospho-SrcKD as substrates. As expected, the pNPP assay  
206 results showed that both rPTP $\epsilon$ D1 wild-type and R220E mutant possess similar  
207 phosphatase activity (Fig. 4e), suggesting the R220E mutation does not affect the  
208 catalytic site. A previous study of PTP1B activity toward phospho-peptide showed  
209 disruption of charge-charge interaction has little effect on  $k_{cat}$ <sup>27</sup>. However, our  
210 phosphatase activity toward phospho-SrcKD revealed a ~30% activity reduction as

211 measured by  $k_{app}$  for the rPTP $\epsilon$ D1-R220E variant (Fig. 4f). Furthermore, sequence  
212 alignment shows that R220 is highly conserved in rPTP $\epsilon$ D1 as well as rPTP $\alpha$ D1 (Fig  
213 5a and 5 b). The rPTP $\alpha$ D1-R317E mutation (corresponding to R220E in rPTP $\epsilon$ ) also  
214 exhibited a ~30% decrease in activity compared to wild type rPTP $\alpha$ D1 (Fig. 4g and 4h),  
215 suggesting our proposed encounter interface may be conserved in the type IV subfamily  
216 of rPTPs.

217

### 218 **Structure analyses of the encounter interface and R220/E486 conformations**

219 To analyze the rPTP $\epsilon$ D1: phospho-Src complex interface, we compared an electrostatic  
220 surface potential map of the crystal structures and simulated complex. Compared to the  
221 rPTP $\epsilon$ D1 active site whose entry covers a surface of 145 Å<sup>2</sup>, the encounter interface  
222 provides additional attractive interaction surface area of 1084 Å<sup>2</sup> (Fig. 5c). The  
223 comparison of individual structures from the crystal and simulated complex revealed  
224 that the simulated complex undergoes local conformational changes near the encounter  
225 interface and leads to favorable electrostatic interactions (Fig. 5d and S2). In particular,  
226 the residue R220 at encounter interface adopts an alternative rotamer conformation  
227 (favored 11.3% based on Molprobit analysis), providing an attractive favorable  
228 contact in the interface. In the case of SrcKD, Glu486 locating on a flexible loop flips  
229 up to a distance of 4.5 Å towards the R220, contributing to a favorable electrostatic  
230 interaction in the encounter complex interface. Further analyses of uncomplexed  
231 ensembles from our simulated dissociate pathway, several rPTP $\epsilon$ D1-R220 conformers  
232 similar to the crystal structure can be observed and the Src-loop containing E486 is  
233 dynamic, suggesting that the crystal structure can change freely to the conformation of  
234 simulated MD complex (Fig. S4).

235

## 236 **DISCUSSION**

237 Although X-ray crystallography and cryoEM are best suited for protein complex  
238 structure determination, the weak and transient nature of interactions between PTPs and  
239 their protein substrates has substantially hindered structural understanding of these  
240 complex interactions using conventional approaches. Multiscale MD simulation  
241 provides an alternative way to reveal these type of interactions but requires extremely  
242 long time-scale simulation to reach convergence. In this study, we describe a general  
243 approach to probe the interactions using rPTPεD1: phospho-SrcKD complex as a model  
244 system. Our strategy, which employs small-angle X-ray scattering guided docking and  
245 pTyr-tailored molecular simulation, revealed to date unknown interactions distal to the  
246 rPTPεD1 active site that play critical roles in complex formation. An initial complex  
247 model can be quickly provided by a SAXS guided rigid-body approach. After manual  
248 phospho-peptide docking to link the two proteins with a strong attractive force, MD  
249 relaxation guided by energy minimization fine-tune the encounter interface. *In silico*  
250 dissociation sampling after purposely removing pTyr interaction allows identification  
251 of the key interactions which can then be validated by site-mutagenesis and developed  
252 binding experiments. Our integrative approach provides a strategy for the structural  
253 characterization of other PTP: phospho-protein complexes.

254 Our structure reveals a key charge-charge interaction between rPTPεD1-R220 and  
255 phospho-SrcKD-E486 far from the active site for complex formation (Fig. 3f).  
256 Systematic analyses of 131 protein-protein hetero-complexes in the PDB also shows  
257 that transient charge-charge interaction is predominant in signaling complexes, which  
258 is consistent with our finding<sup>29</sup>. The electrostatic interactions remain effectively with a  
259 distance of 10-20 Å<sup>30</sup>. We postulate a long-range electrostatic interaction between R220  
260 and E486 brings rPTPεD1 and SrcKD into proximity at the beginning of complex

261 formation. Once the R220:E486 encounter interface is established, the second  
262 interaction between K237 and D518 is formed. The conformation adopted by D518 in  
263 the K237: D518 interaction orients the dynamic C-terminal pTyr527 (connected  
264 through the main chain) into the rPTPεD1 active site for dephosphorylation. This  
265 proposed association pathway accompanies a 7.5-fold wider charge-charge interface to  
266 increase the probability of rPTPεD1: phospho-SrcKD complex formation compared to  
267 the interface between rPTPεD1 and pTyr (Fig. 5e). The R220E variant that partially  
268 disrupts the charge-charge interaction and additional contacts at the encounter interface  
269 results in the reduction of the association rate and phosphatase activity, supporting our  
270 proposed mechanism.

271 Structure analyses suggested that individual protein conformations in the un-complexed  
272 state (crystal structure) and the complexed state (MD simulated ones) can be freely  
273 interchangeable prior to complex formation. However, conformations in the complexed  
274 state provide more favorable binding energies by increasing attractive interactions. In  
275 contrast, the R220E variant mimicking the repulsive interaction that would result from  
276 the rigid-body docking conformation observed in the crystal structure binds to Src with  
277 a slower association rate and has reduced phosphatase activity. The R220E variant and  
278 wild-type have similar  $k_{off}$  rates. Taken together, our data demonstrate that the  
279 molecular recognition of rPTPεD1 is consistent with a conformational selection  
280 mechanism (Fig. 6), with a conformational change before the binding event, rather than  
281 an induced-fit mechanism.

282

## 283 **Materials and Methods**

### 284 **Cloning, expression and purification of the rPTPεD1 and SrcKD**

285 His tagged human Src kinase domain (Trp 260-Leu 533) was cloned into a modified  
286 pET vector for recombinant protein production. In this construct, the ATP binding site  
287 (K295M) and autophosphorylation sites (Y416F) of SrcKD were mutated to generate  
288 fully inactive Src by site-directed mutagenesis. The His- and MBP-tagged human  
289 rPTP $\epsilon$ D1 Domain (Ser 101-Thr 400) was cloned into a modified pET9a vector. A TEV  
290 protease cutting site is located between the tag and constructed protein domains. In this  
291 study, the substrate trapping C335S mutant was created for all binding studies. The  
292 R220E mutant was generated by site-directed mutagenesis. The human rPTP $\alpha$ D1  
293 (Ser211-Thr512) plasmids were created in a similar way to the rPTP $\epsilon$ D1 constructs.  
294 The plasmids were subsequently transformed into *Escherichia coli* BL21 (DE3) cells,  
295 which were grown at 37 °C in LB medium supplemented with 100 mg/L ampicillin  
296 until OD<sub>600</sub> reached ~ 0.8. The proteins were overexpressed by the addition of IPTG to  
297 a final concentration of 0.5 mM. After an additional incubation for 8 hours at 16 °C,  
298 the culture was harvested by centrifugation at 8,000 × g for 20 minutes. Cell pellets  
299 were re-suspended in buffer-A (100 mM phosphate buffer at pH 7.5, 500 mM NaCl,  
300 10% glycerol and 10 mM  $\beta$ -mercaptoethanol). The suspension was lysed by sonication  
301 and centrifuged at 35,000 × g at 4 °C for 45 minutes. The supernatant was loaded onto  
302 a nickel-affinity column pre-equilibrated with buffer-A. The protein was washed with  
303 buffer-A with various concentrations of imidazole and finally eluted with buffer-B (50  
304 mM Tris-HCl pH 7.5, 500 mM NaCl, 500 mM imidazole). The fractions containing  
305 tagged SrcKD or rPTP $\epsilon$ D1 were pooled and treated with TEV protease to remove the  
306 tags. The tag-free SrcKD/rPTP $\epsilon$ D1 proteins were further purified by a nickel-affinity  
307 column. The flow-through was subsequently concentrated and purified by size-  
308 exclusion chromatography (SEC) column, which was pre-equilibrated with 20 mM Tris  
309 pH 7.5, 150 mM NaCl, 5 mM DTT, 5% glycerol.

### 310 **The Phosphorylated rPTP $\epsilon$ D1: SrcKD Complex**

311 The phosphorylation of 60  $\mu$ M SrcKD kinase was achieved by His- and chitin-binding  
312 domain (CBD)- tagged Csk in the presence of 10 mM MgCl<sub>2</sub>, 10 mM DTT, 45  $\mu$ M  
313 ATP, and 5% glycerol at room temperature for 30 minutes and was separated from His-  
314 CBD-CSK protein using Chitin beads. The phosphorylated SrcKD was successively  
315 tested for the extent of phosphorylation by <sup>32</sup>[P] assay<sup>31</sup>. The phosphorylated SrcKD  
316 was mixed with 0.5 molar excess of rPTP $\epsilon$ D1 and the resultant complex was loaded  
317 onto a Superdex 200 HR 10/300 Increase column and separated using 20 mM Tris pH  
318 7.5, 150 mM NaCl, 5 mM DTT buffer. The formation of the rPTP $\epsilon$ D1: SrcKD complex  
319 was further confirmed not only by elution volume but also SDS-PAGE electrophoresis.  
320 Similarly, a comparison of rPTP $\epsilon$ D1/rPTP $\epsilon$ D1-R220E towards cSrc was performed  
321 using a Superdex 75 HR 10/300 column.

### 322 **rPTP $\epsilon$ D1-Src-peptide complex**

323 The FITC labeled pTyr527 phosphorylated Src-peptide (EAQpYQPGENL) was  
324 synthesized at the in-house peptide-synthesis facility. The peptide was dissolved in  
325 DMSO to a final concentration of 10 mM. The rPTP $\epsilon$ D1 (50  $\mu$ M) was incubated with  
326 pTyr527 phosphorylated Src-peptide (150  $\mu$ M) at room temperature for 1 hour. The  
327 subsequent complex was separated using a Superdex 200 HR 10/300 (Increase) column,  
328 pre-equilibrated with SEC buffer. The absorbance was monitored at 280 nm and 494  
329 nm for protein and FITC detection, respectively.

### 330 **Analytic ultracentrifugation**

331 Sedimentation velocity analysis was performed with an XL-A analytical ultracentrifuge  
332 (Beckman Coulter) with absorption optics, using an AnTi60 rotor. Samples in 20 mM  
333 Tris-HCl at pH 7.5, 50 mM NaCl and 1 mM TCEP were added to double-sector  
334 centerpieces and centrifuged at 45,000 rpm for 18 hours at 20 °C or 4 °C. Detection of

335 concentrations as a function of radial position and time was performed by optical  
336 density measurements at a wavelength of 280 nm, with absorbance profiles recorded  
337 every 3 min. The buffer density and viscosity were calculated using the software  
338 SEDNTERP, and the data were analyzed using SEDFIT software. The plots of the AUC  
339 profiles were made with Prism7.

#### 340 **SAXS model of rPTPεD1: phospho-SrcKD Complex**

341 Small-angle X-ray scattering (SAXS) data was collected on beamline BL23A at the  
342 National Synchrotron Radiation Research Center (NSRRC, Hsinchu, Taiwan). The  
343 rPTPεD1: phospho-SrcKD complex was prepared in 20 mM Tris pH-8.0, 50 mM NaCl,  
344 5 mM DTT and concentrated to 6 mg/ml, then was injected to online SEC-SAXS  
345 equipped with a temperature-controlled (15 °C) silica-based SEC column (Agilent  
346 BioSEC-3)<sup>32</sup>. The SAXS profiles of sample buffer after the elution peaks of protein  
347 samples were collected for background subtraction. All SAXS two-dimensional images  
348 were processed and transferred into one-dimensional intensity curves by an in-house  
349 program established by LabVIEW<sup>32</sup>. The output text files were further processed using  
350 the PRIMUS software suite<sup>33</sup>. Parameters such as radius of gyration ( $R_g$ ), the maximum  
351 particle dimensions ( $D_{max}$ ), and the Porod volume ( $V_p$ ) were evaluated using standard  
352 procedures (Table S1)<sup>33</sup>. The program GNOM was used to calculate the distance  
353 distribution function. The reported crystal structures of the SrcKD, rPTPεD1 were used  
354 as a template to dock the complex structure using the CORAL program<sup>20</sup>. The pTyr527  
355 was manually docked to rPTPεD1 active site based on the crystal structure of pTyr-  
356 peptide bound PTP1B using COOT<sup>25,34</sup>. The missing residues were added using  
357 RosettaCommons<sup>35</sup>. By holding the rPTPεD1 and pTyr527 region of SrcKD connected  
358 and allow the missing N-terminus residues to be flexible, the docking model was  
359 improved by conformational sampling followed by SAXS validation using



360 BIBLOMD<sup>36</sup>. The quality of the fit between models and experimental SAXS profile  
361 was calculated by FoXS<sup>37</sup>.

### 362 **Encounter Interface optimization by Molecular Dynamics Simulation**

363 To understand the key residues involved in the encounter interface, molecular dynamics  
364 (MD) simulations were conducted using the Amber 16 package<sup>38</sup>. The rigid-body  
365 model of rPTPεD1: phospho-SrcKD complex was taken as a starting coordinate for  
366 MD simulations. MD Simulations were performed based on a force field Amber ff14SB  
367<sup>39</sup> that extends the improved residue side-chain torsion potentials. The residue Mulliken  
368 charges were calculated based on the libraries in the Amber 16 package. Periodic  
369 boundary conditions were imposed with box lengths of  $98.33 \times 151.56 \times 105.79 \text{ \AA}^3$ ,  
370 containing 592 amino acid and 48655 TIP4P water models. The MD System underwent  
371 a 15 ns annealing process under the constant pressure of 1.0 bar with equilibrated steps  
372 from 0 to 300 K. The constrain force applied to residue pairs varied from 200 kcal/mol  
373 to 5 kcal/mol until the system density was  $\sim 1.0 \pm 0.01 \text{ g/cm}^3$ . A Langevin thermostat  
374 was used to maintain the system temperature by controlling the collision frequency at  
375  $1 \text{ ps}^{-1}$  to the target temperature 300 K. MD simulations were carried out in the canonical  
376 ensemble (NVT) with the Langevin thermostat to maintain the system temperature. The  
377 SHAKE algorithm was implemented to constrain the covalent bond including hydrogen  
378 atoms. Numerical integration was performed with a time-step of 1 fs for all MD  
379 simulations. We performed  $\sim 0.3 \text{ \mu s}$  MD simulations for checking systems equilibrium  
380 and analyze.

### 381 **Searching the Pathway Trajectory with Steered MD Simulations**

382 We performed steered MD (SMD) simulations<sup>40-42</sup> for the dissociated and associated  
383 state of the complex, employing distance-based collective variables between the  
384 rPTPεD1 and SrcKD domain with the center of mass (COM) distance  $\sim 44.5 - 62.5 \text{ \AA}$ .



385 The force weight sets on the x, y and z-component with the restrain force equal to 5  
386 kcal mol<sup>-1</sup> Å<sup>-2</sup>. For the dissociation process, the initial model was taken from the MD  
387 optimized structure. Simulations were carried out for every 36 windows of 1 ns run, via  
388 a strain velocity during sampling relaxation (pulling force: 5 kcal mol<sup>-1</sup> Å<sup>-2</sup>, velocity:  
389 0.0005 Å ps<sup>-1</sup>), corresponding to a total simulation time of 0.36 μs. For the association  
390 process, the started model was taken from the trajectory of the dissociation process,  
391 with a COM distance ~57 Å. Simulations were carried out for every 50 windows of 1  
392 ns run, via a slower strain velocity during sampling relaxation than that of the  
393 dissociation process (pulling force: 5 kcal mol<sup>-1</sup> Å<sup>-2</sup>, velocity: 0.00025 Å ps<sup>-1</sup>),  
394 corresponding to a total simulation time of 0.5 μs.

### 395 **Estimating the Free Energy via Potential Mean Force (PMF) and Free Energy** 396 **Pathway (FEP)**

397 In umbrella sampling (US-PMF)<sup>43-45</sup>, harmonic restraint is placed at successive points  
398 along with the reaction coordinate with restraining potential form  $V(t) = k(x_t - x_0)^2$ ,  
399 where  $x_0$  is the target distance and  $k$  is the force constant. The reaction path was  
400 stratified into a series of intermediate windows, ranging from 44.5 to 62.5 Å for the  
401 separation of rPTPεD1 and SrcKD. Instantaneous values of the force were accrued in  
402 bins of width equal to 0.5 Å for separation PMFs. The reaction coordinate is defined as  
403 the z-component of the center-of-mass (COM) distance between the rPTPεD1 and the  
404 SrcKD. The path is divided into 36 windows at ~0.5 Å intervals. The restraint force  
405 constants: 5 kcal/mol Å<sup>2</sup> to ensure overlap between each rPTPεD1/SrcKD window and  
406 each window is simulated for 1 ns, corresponding to a total simulation time of 0.36 μs.  
407 After the simulation, the free-energy curves are combined by WHAM which is used to  
408 convert the probabilities into the PMF along with the reaction coordinate at 300 K. The

409 number of points in the final PMF was 1800 (0.01 Å for 1 bin) and the convergence  
410 tolerance for the WHAM calculations was 0.001 kcal/mol.

411 To decompose the estimated binding free energy from US simulations, two-end-state  
412 free energy calculations were performed directly based on the trajectories derived from  
413 the US simulations. We employed the MMGB/PBSA<sup>46,47</sup> method to decompose the  
414 binding free enthalpy. The electrostatic solvation energy was calculated by the GB  
415 model developed by Onufriev (igb=2)<sup>46</sup>. The exterior dielectric constant was set to 80  
416 and the solute dielectric constant was set to 0.1. The non-polar contribution of the  
417 desolvation energy (DGSA) was estimated from the solvent accessible surface area  
418 (SASA) using the LCPO algorithm.

#### 419 **BLI binding assay**

420 To perform the binding experiments, the rPTPεD1-C335S, rPTPεD1-C335S/R220E  
421 and phospho His-cSrcKD-K295M/Y416F proteins were purified. The binding kinetics  
422 of rPTPεD1 and phospho cSrcKD association was measured by BLItz using Ni-NTA  
423 biosensor tips (ForteBio Inc.). Further, the Ni-NTA sensors were pre-hydrated for 10  
424 minutes in SEC buffer. The bait, phospho-His-SrcKD at a concentration of 58 μM was  
425 immobilized to Ni-NTA sensor tips for 3 min. To maintain stable phosphorylation of  
426 SrcKD, the buffer was supplemented with fresh 100 μM ATP and 1 μM Csk before  
427 every immobilization. Once the bait protein reached saturation, subsequent association  
428 of rPTPεD1/rPTPεD1-R220E proteins to the bait were allowed for 120 sec followed by  
429 a 3 min. dissociation step. The BLI data was processed by the BLItz Pro software and  
430 plotted in Graphpad Prism7.

#### 431 **pNPP assay**

432 The rPTPεD1/rPTPαD1 phosphatase assay using pNPP as the substrate was performed  
433 as previously described<sup>48,49</sup>. In brief, the purified rPTPεD1, rPTPαD1, rPTPεD1-R220E,

434 or rPTP $\alpha$ D-R317E proteins were added in a solution containing 20 mM Tris-HCl (pH  
435 7.5), 50 mM NaCl, and 20 mM pNPP. The reactions were incubated for 30 min, the  
436 level of dephosphorylation was measured at 405 nm using a UV spectrometer. All  
437 measurements were performed in triplicate.

#### 438 **Phosphatase activity assay**

439 The phosphatase activity of rPTP $\epsilon$ D1/rPTP $\alpha$ D1 wild type and rPTP $\epsilon$ D1-  
440 R220E/rPTP $\alpha$ D1-R317E mutants were measured using the phosphate colorimetric  
441 assay kit (Bio Vision, Milpitas, CA). The purified wild-type rPTP $\epsilon$ D1/rPTP $\alpha$ D1 and  
442 rPTP $\epsilon$ D1-R220E/rPTP $\alpha$ D1-R317E were mixed with 20  $\mu$ M phosphorylated cSrcKD in  
443 a solution containing 20 mM Tris-HCl (pH 7.5), 50 mM NaCl and incubated for 30 min.  
444 The dephosphorylation of the phosphatase was quenched by the addition of kit reagent,  
445 the reactions were further incubated for 15 min. The dephosphorylation levels were  
446 measured by absorbance at 650 nm using a TECAN M1000pro. Assays were performed  
447 according to the manufacturer's instructions. All measurements were performed in  
448 triplicate. A control phosphorylated cSrcKD was subtracted from all runs. The figures  
449 for publication were generated using Graphpad Prism7 software.

450

#### 451 **Data availability**

452 The SAXS data accession code for rPTP $\epsilon$ D1: phospho-SrcKD complex is SASDJ33.

453

#### 454 **Acknowledgment**

455 We thank Dr. Orion Shih and Kuei-Fei Liao at the NSRRC TLS23A beamline and Dr.  
456 Meng-Ru Ho of the Biophysics Facility, Institute of Biological Chemistry, Academia  
457 Sinica for assistance in different data collection. We acknowledge the peptide synthesis  
458 core, Institute of Biological Chemistry, Academia Sinica for pTyr-peptide synthesis

459 and the National Synchrotron Radiation Research Center, Taiwan, for use of the BL23A  
460 beamline for SEC-SAXS data collection. We also thank Dr. Yu-Ching Lin for his  
461 assistance in BLI data interpretation. This work was partially funded by the Academia  
462 Sinica (AS-104-TP-B05) and Taiwan Protein Project (Grant No. AS-KPQ-105-TPP).

463

#### 464 **Author Contributions**

465 N.E.K and S.K.T performed recombinant protein preparation. N.E.K and Y.Y collected  
466 SAXS data and completed the complex model building. C.H.Y. performed MD  
467 simulations. N.E.K performed phosphatase activity and binding assays. N.E.K., C.H.Y.,  
468 H.C.Y and M.C.H. wrote the manuscript. N.E.K., H.C.Y and M.C.H. designed the  
469 experiments. H.C.Y and M.C.H. supervised the work.

470

#### 471 **Competing interests**

472 The authors declare no competing interests

473

474 **Figures**

475

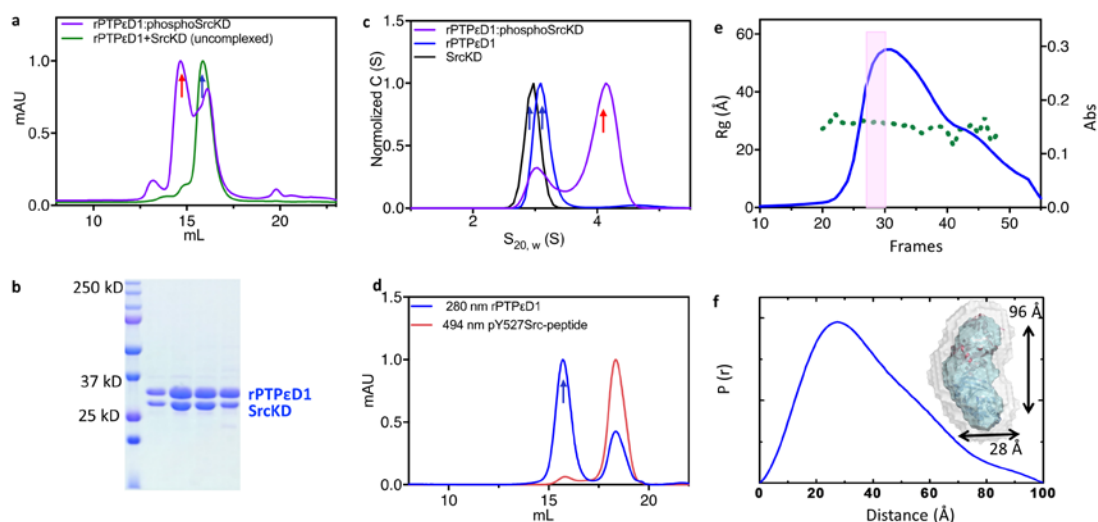

476

477

478 **Figure 1. Characterization of the rPTP $\epsilon$ D1: SrcKD complex.** (a) The overlaid SEC  
479 profile of rPTP $\epsilon$ D1: phospho-SrcKD complex colored in violet and a mixture of  
480 rPTP $\epsilon$ D1 + unphosphorylated SrcKD (no complex form) colored in green. The elution  
481 position of complex and uncomplexed proteins are indicated as red and blue arrows,  
482 respectively (b) The SDS-PAGE result from SEC of rPTP $\epsilon$ D1: phospho-SrcKD  
483 complex. The first lane is the reference marker with the corresponding MW shown.  
484 Lane 2-4 correspond to the highest peak area (red arrow) from SEC of PTP $\epsilon$ D1: SrcKD  
485 complex shown in Fig. 2a. (c) The overlaid distribution of the sedimentation coefficient  
486 of rPTP $\epsilon$ D1, phospho-SrcKD and complex are shown in blue, black and violet,  
487 respectively. The complex revealed an additional peak with  $S_{20,w}$  value of 4.1. The  
488 sedimentation coefficient of complex and uncomplexed protein are indicated as red and  
489 blue arrows, respectively. (d) Binding efficiency analysis of Src pTyr527 peptide  
490 towards rPTP $\epsilon$ D1. The peptide is labeled with FITC which can be detected by UV  
491 absorption at 484 nm wavelength (shown in red). The rPTP $\epsilon$ D1 is eluted at 14 mL of  
492 elution volume as a peak with UV absorption at 280 nm (shown in blue and a blue  
493 arrow). The peptide is eluted at 18 mL elution volume and is not co-eluted with  
494 rPTP $\epsilon$ D1. (e)  $R_g$  (green dots) extracted from the SEC-SAXS data measured along with  
495 the chromatogram (280 nm wavelength, blue line). (f) The pair-distance distributions  
496  $P(r)$  computed from the scattering data from (a) plots of the rPTP $\epsilon$ D1:SrcKD complex.  
497 Molecular envelope derived from SAXS data is shown.

498

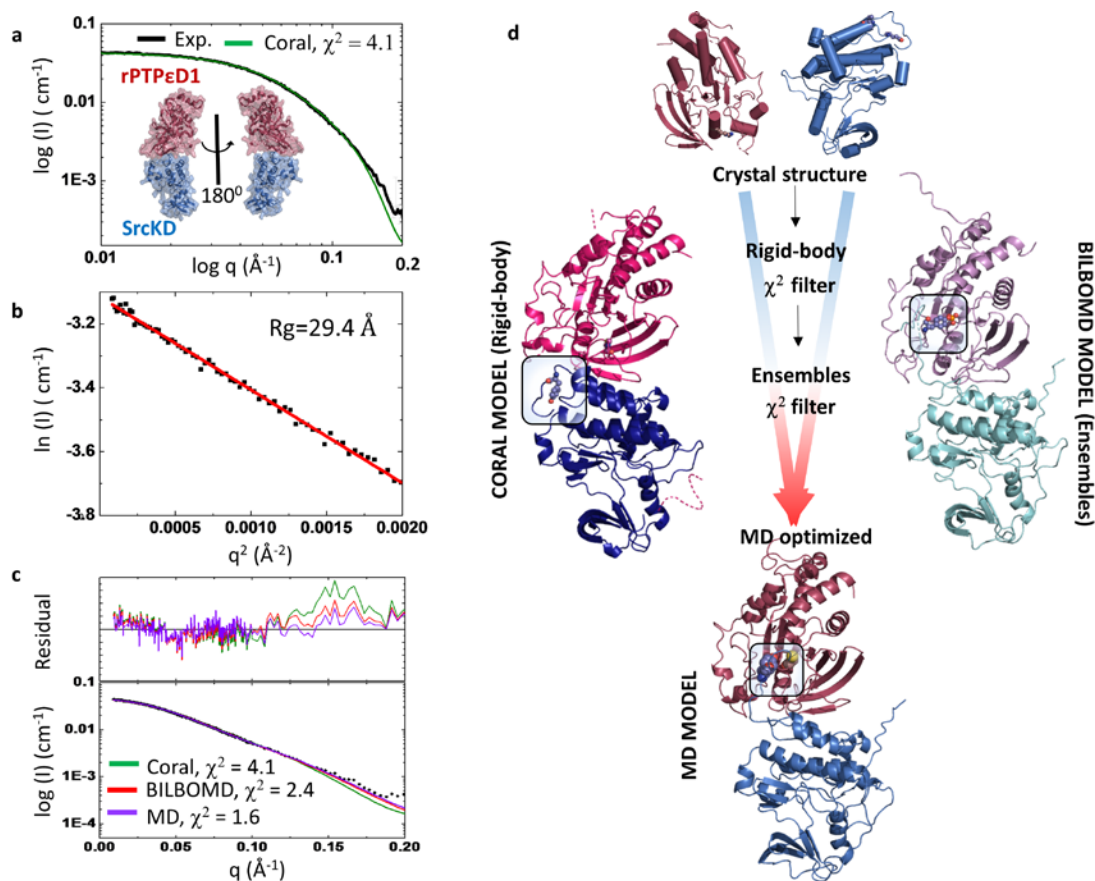

499

500

501 **Figure 2. SEC-SAXS data and analysis of rPTPε:phospho-Src complex results.** (a)

502 (a) The simulated SAXS curve from the CORAL docking model (shown in green) is

503 overlaid with experimental SAXS data on rPTPεD1: phospho-SrcKD complex (shown

504 in black) with the  $\chi^2$  of 4.1. The CORAL docking model of rPTPεD1: phospho-SrcKD.

505 The rPTPεD1 and SrcKD are colored in pink and blue, respectively. (b) The Gunier plot

506 is shown with  $R_g$  of 29.4 Å. (c) Comparison of CORAL, BILBOMD and MD

507 simulation model of rPTPεD1: phospho-SrcKD complex. The corresponding scattering

508 profile and fitting of the experimental profile are overlaid. The  $\chi^2$  calculated by FoXS

509 is indicated. (d) The flow-chart of MD complex generation from the individual crystal

510 structure. The individual crystal structure and CORAL, BILBOMD and MD simulated

511 complex models are shown. The rPTPεD1 and SrcKD are colored in magenta and blue

512 system. The pTyr527 of SrcKD is highlighted in the box.

513

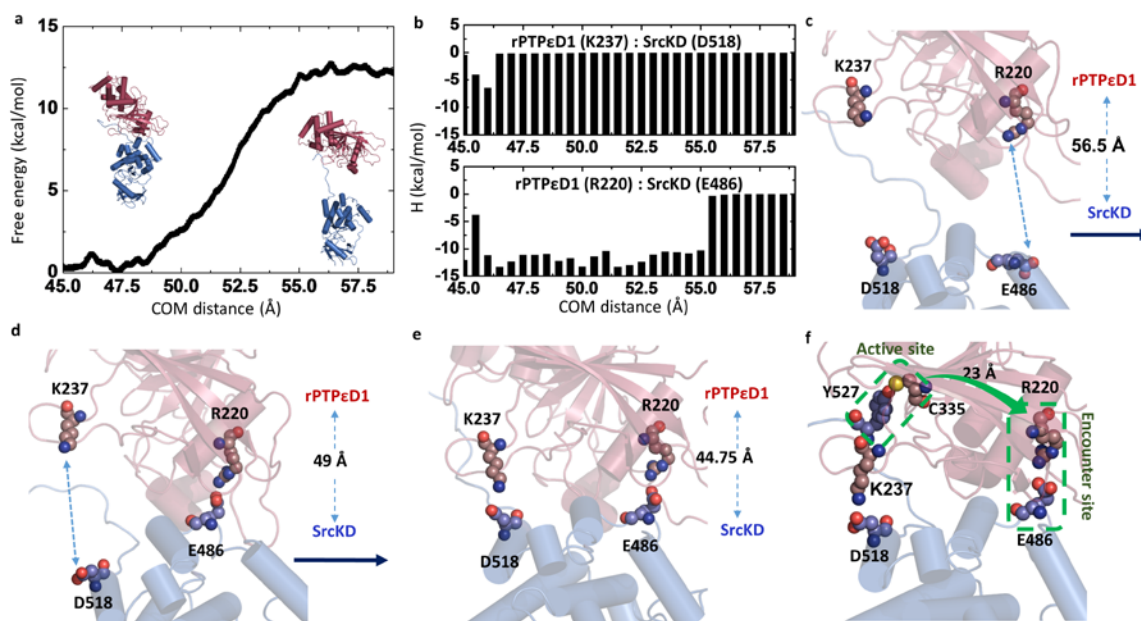

514  
 515  
 516  
 517  
 518  
 519  
 520  
 521  
 522  
 523  
 524  
 525  
 526  
 527  
 528  
 529  
 530  
 531

**Figure 3. MD simulation reveals the trajectory snapshot along with the COM distance of the rPTPεD1:SrcKD complex formation.** (a) In PMF approach, the free energy change along the COM distance revealed that unbound state in the COM distance was separated by 56.5 Å. (b) The energy decomposition by MM-GBSA was made to evaluate the contribution of three interacting residue pairs, The identified crucial interactions between the rPTPεD1:SrcKD complex is highly consistent with the MD optimized model. Also, the steered MD simulation mapping the interactions during complex formation. (c) In the unbound states, the complex initially formed a dynamic contact interface with the rPTPεD1 and SrcKD that COM distance is 56.5 Å. (d) Upon forming R220-E486 contacts, then K237-D518 contacts in the intermediate state. (e) Finally, the formation of these contacts facilitated the rearrangement of the complex to the bound state. (f) the proposed rPTPεD1: SrcKD docking model focused on the encounter site and active-site residues. The R220 is 23 Å away from the active-site residue, C335. The key interface residues and active-site residues are showed as spheres and labeled.



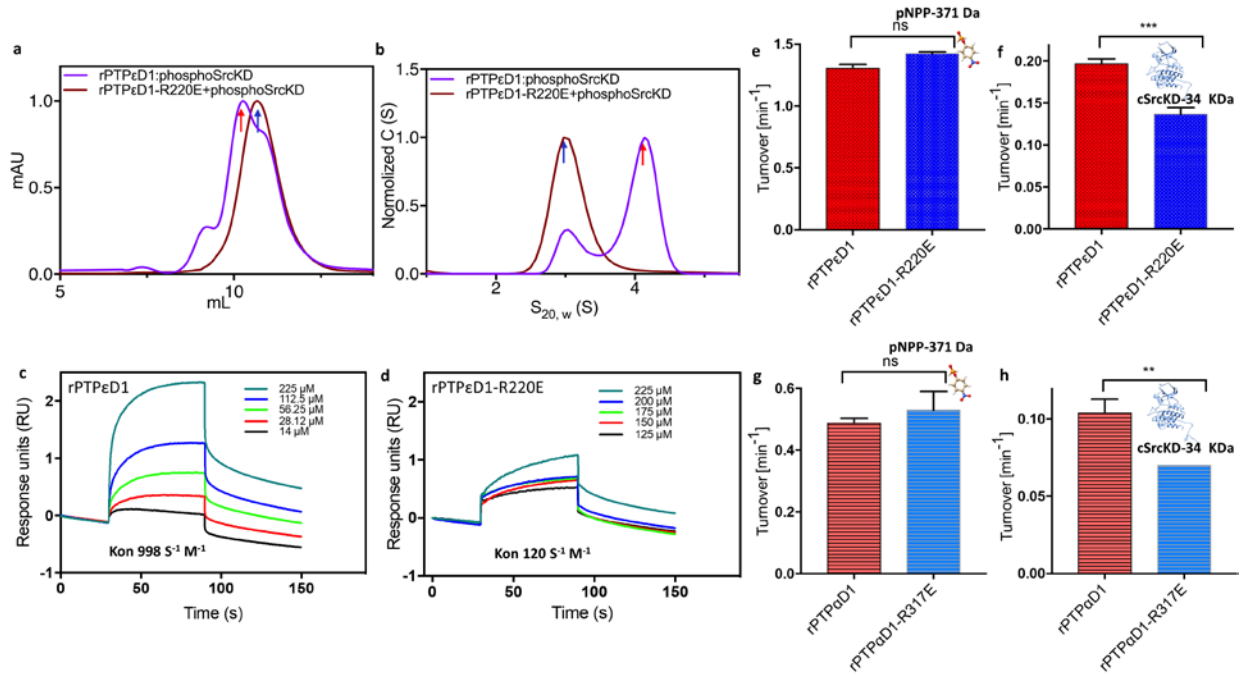

532

533 **Figure 4. Comparison of rPTPεD1/rPTPεD1-R220E and wild-type toward**

534 **phospho-SrcKD.** (a) Elution profiles of rPTPεD1: SrcKD complex via SEC depicted

535 in violet and of rPTPεD1-C335S/R220E:cSrcKD complex shown in brown. An excess

536 amount of rPTPεD1 is added in rPTPεD1: SrcKD complex to show the elution volume

537 of the uncomplexed form (the peak after 10 mL elution volume), which is overlaid with

538 the peak of rPTPεD1-R220E: SrcKD complex, indicating transient complex formation.

539 The elution position of complex and uncomplex are indicated as red and blue arrows,

540 respectively. (b) The overlaid distribution of the sedimentation coefficient of rPTPεD1:

541 SrcKD complex illustrated in violet and rPTPεD1-R220E: SrcKD complex is in brown.

542 The sedimentation coefficient of complex and uncomplex proteins are indicated with

543 red and blue arrows, respectively. (c) BLI sensogram of rPTPεD1 binding to the

544 immobilized phospho-SrcKD protein. Various concentrations of rPTPεD1 are shown

545 in different colors and labeled. The  $k_{on}$  value is indicated. (d) BLITz sensogram of

546 rPTPεD1-R220E binding to the immobilized phospho-SrcKD protein. Various

547 concentrations of rPTPεD1-R220E are shown in different colors and labeled. The  $k_{on}$

548 value is indicated. (e) The phosphatase activities of rPTPεD1 and rPTPεD1-R220E

549 against pNPP is depicted in red and blue color, respectively. (f) Phosphatase activities

550 of rPTPεD1 and rPTPεD1-R220E against phosphorylated SrcKD are illustrated in red

551 and blue color, respectively. (g) The phosphatase activities of rPTPαD1 and rPTPαD1-

552 R371E against pNPP is depicted in red and blue color, respectively. (h) Phosphatase

553 activities of rPTPαD1 and rPTPαD1-R371E against phosphorylated SrcKD are

554 illustrated in red and blue color, respectively.

555



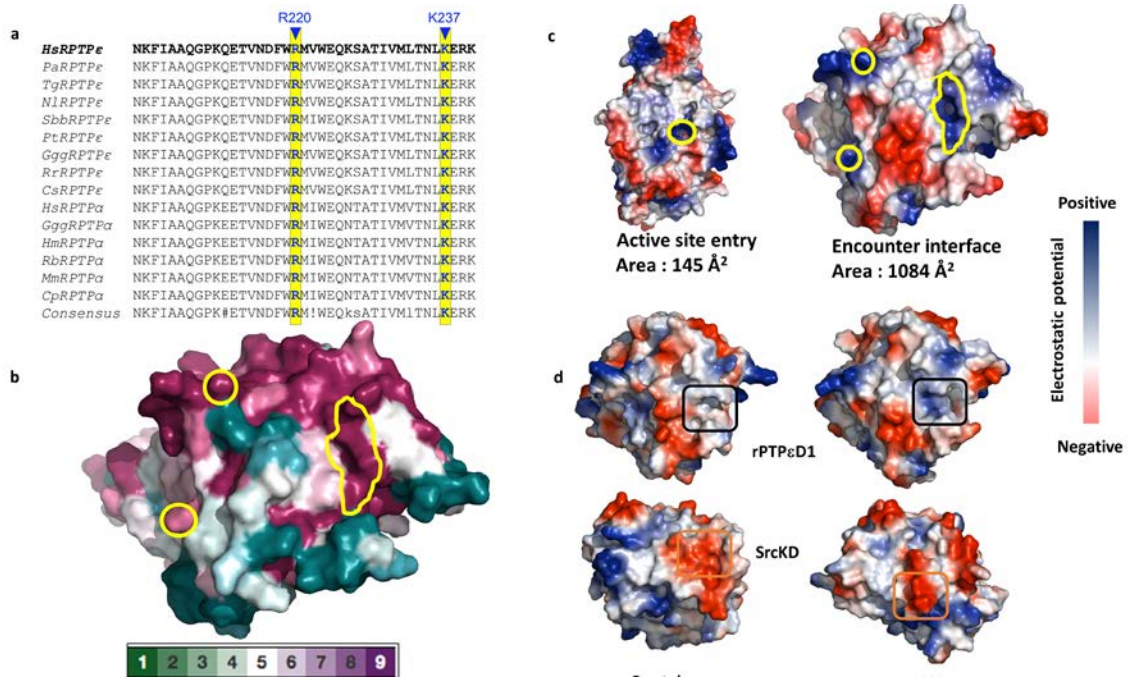

556

557

558 **Figure 5. Activity comparison of rPTPεD1/rPTPεD1-R220E and surface**  
 559 **potentials analyses**

560 (a) Multiple sequence alignment of rPTPε and rPTPα from different species. The  
 561 interface residues of the rPTPεD1: SrcKD complex, R220 and K237 are conserved in  
 562 all available species of rPTPε/α. (b) The encounter residues are shown in surface  
 563 representation with evolutionarily conserved and divergent residues colored. Fully  
 564 conserved residues are in pink and highly divergent residues are in green. The encounter  
 565 interface is highlighted in yellow circles. (c) The surface area comparison between the  
 566 active site entry (left) and the encounter interface (right). The active site entry of pTyr  
 567 and the encounter interface are highlighted in yellow circles. (d) Electrostatic potential  
 568 surface focusing on encounter interface of rPTPεD1 and SrcKD from the initial crystal  
 569 structure (left) and final MD model (right). The positive surface colored in blue and the  
 570 negative surface colored in red. The rPTPεD1-R220 and SrcKD-E486 regions are  
 571 highlighted in black and orange squared

572

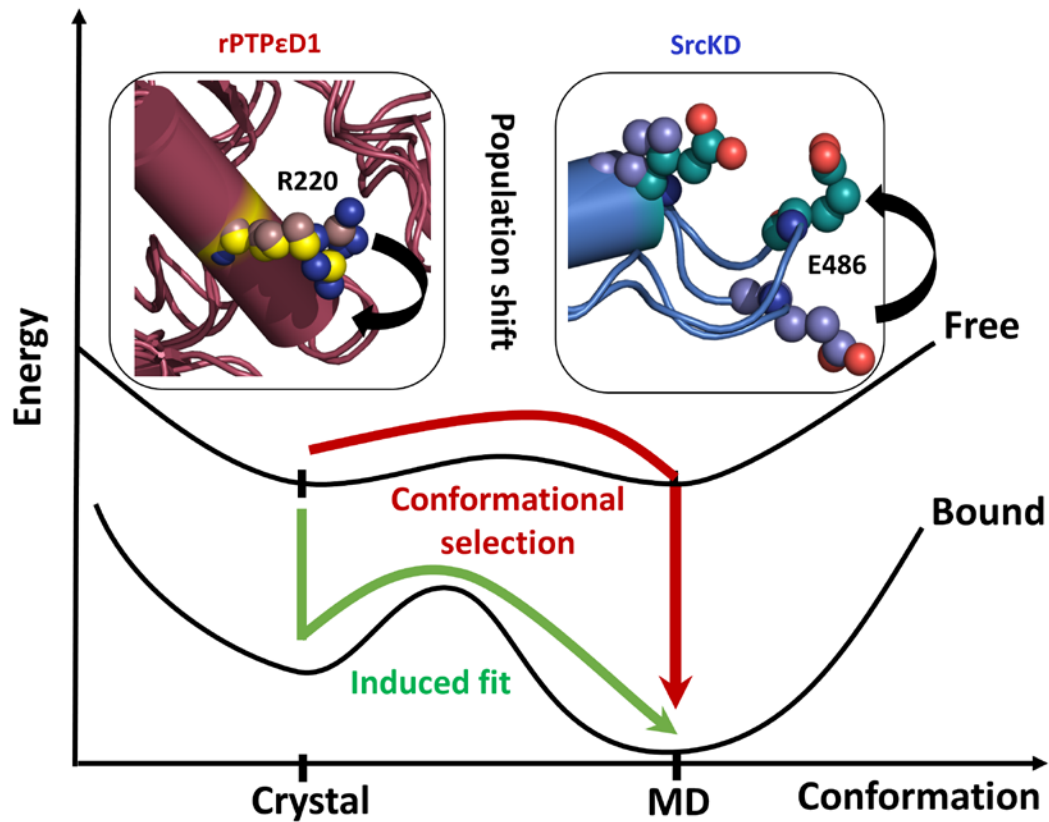

573

574

575 **Figure 6. Proposed conformational selection mechanism.** The schematic diagram  
576 illustrates the conformational selection of the rPTPεD1: Phospho Src complex.

577

578

579

580

581

582

583

584

585

586

587

588

589

590

591

592

593

594

595

596

597

598 **References:**

599

- 600 1 Ostman, A., Hellberg, C. & Bohmer, F. D. Protein-tyrosine phosphatases and  
601 cancer. *Nat Rev Cancer* **6**, 307-320, doi:10.1038/nrc1837 (2006).
- 602 2 De Munter, S., Kohn, M. & Bollen, M. Challenges and opportunities in the  
603 development of protein phosphatase-directed therapeutics. *ACS Chem Biol* **8**,  
604 36-45, doi:10.1021/cb300597g (2013).
- 605 3 Stanford, S. M. *et al.* Receptor Protein Tyrosine Phosphatase  $\alpha$ -Mediated  
606 Enhancement of Rheumatoid Synovial Fibroblast Signaling and Promotion of  
607 Arthritis in Mice. *Arthritis Rheumatol* **68**, 359-369, doi:10.1002/art.39442  
608 (2016).
- 609 4 Motiwala, T. & Jacob, S. T. *Progress in Nucleic Acid Research and Molecular*  
610 *Biology* 297-329 (2006).
- 611 5 Elchebly, M. *et al.* Increased Insulin Sensitivity and Obesity Resistance in Mice  
612 Lacking the Protein Tyrosine Phosphatase-1B Gene. **283**, 1544-1548,  
613 doi:10.1126/science.283.5407.1544 %J Science (1999).
- 614 6 Rousoo-Noori, L. *et al.* Protein tyrosine phosphatase epsilon affects body  
615 weight by downregulating leptin signaling in a phosphorylation-dependent  
616 manner. *Cell metabolism* **13**, 562-572, doi:10.1016/j.cmet.2011.02.017 (2011).
- 617 7 Barford, D., Das, A. K. & Egloff, M. P. The structure and mechanism of protein  
618 phosphatases: insights into catalysis and regulation. *Annual review of*  
619 *biophysics and biomolecular structure* **27**, 133-164,  
620 doi:10.1146/annurev.biophys.27.1.133 (1998).
- 621 8 Meyer, C. *et al.* Development of accessible peptidic tool compounds to study  
622 the phosphatase PTP1B in intact cells. *ACS Chem Biol* **9**, 769-776,  
623 doi:10.1021/cb400903u (2014).
- 624 9 Zheng, X. M., Resnick, R. J. & Shalloway, D. A phosphotyrosine displacement  
625 mechanism for activation of Src by PTPalpha. *EMBO J* **19**, 964-978,  
626 doi:10.1093/emboj/19.5.964 (2000).
- 627 10 Ren, L. *et al.* Substrate specificity of protein tyrosine phosphatases 1B, RPTP $\alpha$ ,  
628 SHP-1, and SHP-2. *Biochemistry* **50**, 2339-2356, doi:10.1021/bi1014453  
629 (2011).
- 630 11 Bilwes, A. M., den Hertog, J., Hunter, T. & Noel, J. P. Structural basis for  
631 inhibition of receptor protein-tyrosine phosphatase-alpha by dimerization.  
632 *Nature* **382**, 555-559, doi:10.1038/382555a0 (1996).
- 633 12 Barr, A. J. *et al.* Large-scale structural analysis of the classical human protein  
634 tyrosine phosphatome. *Cell* **136**, 352-363, doi:10.1016/j.cell.2008.11.038  
635 (2009).
- 636 13 Veeramani, S., Lee, M.-S. & Lin, M.-F. Revisiting histidine-dependent acid  
637 phosphatases: a distinct group of tyrosine phosphatases. *Trends Biochem Sci* **34**,  
638 273-278, doi:10.1016/j.tibs.2009.03.002 (2009).
- 639 14 Sonnenburg, E. D., Bilwes, A., Hunter, T. & Noel, J. P. The structure of the  
640 membrane distal phosphatase domain of RPTPalpha reveals interdomain  
641 flexibility and an SH2 domain interaction region. *Biochemistry* **42**, 7904-7914,  
642 doi:10.1021/bi0340503 (2003).
- 643 15 Wen, Y. *et al.* RPTP $\alpha$  phosphatase activity is allosterically regulated by the  
644 membrane-distal catalytic domain. *The Journal of biological chemistry* **295**,  
645 4923-4936, doi:10.1074/jbc.RA119.011808 (2020).

- 646 16 Goldberg, A. B., Cho, E., Miller, C. J., Lou, H. J. & Turk, B. E. Identification  
647 of a Substrate-selective Exosite within the Metalloproteinase Anthrax Lethal  
648 Factor. **292**, 814-825, doi:10.1074/jbc.M116.761734 (2017).
- 649 17 Li, S., Depetris, R. S., Barford, D., Chernoff, J. & Hubbard, S. R. Crystal  
650 Structure of a Complex between Protein Tyrosine Phosphatase 1B and the  
651 Insulin Receptor Tyrosine Kinase. *Structure* **13**, 1643-1651,  
652 doi:10.1016/j.str.2005.07.019 (2005).
- 653 18 Yang, S., Blachowicz, L., Makowski, L. & Roux, B. Multidomain assembled  
654 states of Hck tyrosine kinase in solution. **107**, 15757-15762,  
655 doi:10.1073/pnas.1004569107 %J Proceedings of the National Academy of  
656 Sciences (2010).
- 657 19 Tria, G., Mertens, H. D. T., Kachala, M. & Svergun, D. I. Advanced ensemble  
658 modelling of flexible macromolecules using X-ray solution scattering. *IUCrJ* **2**,  
659 207-217, doi:doi:10.1107/S205225251500202X (2015).
- 660 20 \it ATSAS 2.8 : a comprehensive data analysis suite for small-angle scattering  
661 from macromolecular solutions. *Journal of applied crystallography* **50**, 1212--  
662 1225, doi:10.1107/S1600576717007786 (2017).
- 663 21 Pelikan, M., Hura, G. L. & Hammel, M. Structure and flexibility within proteins  
664 as identified through small angle X-ray scattering. *General physiology and*  
665 *biophysics* **28**, 174-189, doi:10.4149/gpb\_2009\_02\_174 (2009).
- 666 22 Levinson, N. M., Seeliger, M. A., Cole, P. A. & Kuriyan, J. Structural basis for  
667 the recognition of c-Src by its inactivator Csk. *Cell* **134**, 124-134,  
668 doi:10.1016/j.cell.2008.05.051 (2008).
- 669 23 Destaing, O. *et al.* The tyrosine kinase activity of c-Src regulates actin dynamics  
670 and organization of podosomes in osteoclasts. *Mol Biol Cell* **19**, 394-404,  
671 doi:10.1091/mbc.e07-03-0227 (2008).
- 672 24 Kmiecik, T. E., Johnson, P. J. & Shalloway, D. Regulation by the  
673 autophosphorylation site in overexpressed pp60c-src. *Molecular and cellular*  
674 *biology* **8**, 4541-4546, doi:10.1128/mcb.8.10.4541 (1988).
- 675 25 Salmeen, A., Andersen, J. N., Myers, M. P., Tonks, N. K. & Barford, D.  
676 Molecular basis for the dephosphorylation of the activation segment of the  
677 insulin receptor by protein tyrosine phosphatase 1B. *Mol Cell* **6**, 1401-1412,  
678 doi:10.1016/s1097-2765(00)00137-4 (2000).
- 679 26 Pan, A. C. *et al.* Atomic-level characterization of protein–protein association.  
680 **116**, 4244-4249, doi:10.1073/pnas.1815431116 %J Proceedings of the National  
681 Academy of Sciences (2019).
- 682 27 Selner, N. G. *et al.* Diverse Levels of Sequence Selectivity and Catalytic  
683 Efficiency of Protein-Tyrosine Phosphatases. *Biochemistry* **53**, 397-412,  
684 doi:10.1021/bi401223r (2014).
- 685 28 Schreiber, G., Haran, G. & Zhou, H. X. Fundamental Aspects of  
686 Protein–Protein Association Kinetics. *Chemical Reviews* **109**, 839-860,  
687 doi:10.1021/cr800373w (2009).
- 688 29 Cho, K. i. *et al.* Specificity of molecular interactions in transient protein–protein  
689 interaction interfaces. **65**, 593-606 (2006).
- 690 30 Sagui, C. & Darden, T. A. Molecular dynamics simulations of biomolecules:  
691 long-range electrostatic effects. *Annual review of biophysics and biomolecular*  
692 *structure* **28**, 155-179, doi:10.1146/annurev.biophys.28.1.155 (1999).
- 693 31 Karra, A. S., Stippec, S. & Cobb, M. H. Assaying Protein Kinase Activity with  
694 Radiolabeled ATP. *J Vis Exp*, 55504, doi:10.3791/55504 (2017).



- 695 32 Yeh, Y.-Q. *et al.* Probing the Acid-Induced Packing Structure Changes of the  
696 Molten Globule Domains of a Protein near Equilibrium Unfolding. *The Journal*  
697 *of Physical Chemistry Letters* **8**, 470-477, doi:10.1021/acs.jpcllett.6b02722  
698 (2017).
- 699 33 Petoukhov, M. V. *et al.* New developments in the ATSAS program package for  
700 small-angle scattering data analysis. *J Appl Crystallogr* **45**, 342-350,  
701 doi:10.1107/s0021889812007662 (2012).
- 702 34 Emsley, P., Lohkamp, B., Scott, W. G. & Cowtan, K. Features and development  
703 of Coot. *Acta Crystallogr D Biol Crystallogr* **66**, 486-501,  
704 doi:10.1107/S0907444910007493 (2010).
- 705 35 Shih, O. *et al.* Oligomerization process of Bcl-2 associated X protein revealed  
706 from intermediate structures in solution. *Phys Chem Chem Phys* **19**, 7947-7954,  
707 doi:10.1039/c6cp08820a (2017).
- 708 36 Pelikan, M., Hura, G. L. & Hammel, M. Structure and flexibility within proteins  
709 as identified through small angle X-ray scattering. *General physiology and*  
710 *biophysics* **28**, 174-189, doi:10.4149/gpb\_2009\_02\_174 (2009).
- 711 37 Schneidman-Duhovny, D., Hammel, M., Tainer, J. A. & Sali, A. Accurate  
712 SAXS profile computation and its assessment by contrast variation experiments.  
713 *Biophys J* **105**, 962-974, doi:10.1016/j.bpj.2013.07.020 (2013).
- 714 38 Case, D. *et al.* Amber 16, University of California, San Francisco. (2016).
- 715 39 Maier, J. A. *et al.* ff14SB: Improving the Accuracy of Protein Side Chain and  
716 Backbone Parameters from ff99SB. *Journal of Chemical Theory and*  
717 *Computation* **11**, 3696-3713, doi:10.1021/acs.jctc.5b00255 (2015).
- 718 40 Ozer, G., Quirk, S. & Hernandez, R. Adaptive steered molecular dynamics:  
719 Validation of the selection criterion and benchmarking energetics in vacuum.  
720 *The Journal of Chemical Physics* **136**, 215104, doi:10.1063/1.4725183 (2012).
- 721 41 Iannuzzi, M., Laio, A. & Parrinello, M. Efficient Exploration of Reactive  
722 Potential Energy Surfaces Using Car-Parrinello Molecular Dynamics. *Physical*  
723 *Review Letters* **90**, 238302, doi:10.1103/PhysRevLett.90.238302 (2003).
- 724 42 Wang, F. & Landau, D. P. Efficient, Multiple-Range Random Walk Algorithm  
725 to Calculate the Density of States. *Physical Review Letters* **86**, 2050-2053,  
726 doi:10.1103/PhysRevLett.86.2050 (2001).
- 727 43 Roux, B. The calculation of the potential of mean force using computer  
728 simulations. *Computer Physics Communications* **91**, 275-282,  
729 doi:[https://doi.org/10.1016/0010-4655\(95\)00053-I](https://doi.org/10.1016/0010-4655(95)00053-I) (1995).
- 730 44 Gumbart, J. C., Roux, B. & Chipot, C. Standard Binding Free Energies from  
731 Computer Simulations: What Is the Best Strategy? *Journal of Chemical Theory*  
732 *and Computation* **9**, 794-802, doi:10.1021/ct3008099 (2013).
- 733 45 Torrie, G. M. & Valleau, J. P. Nonphysical sampling distributions in Monte  
734 Carlo free-energy estimation: Umbrella sampling. *Journal of Computational*  
735 *Physics* **23**, 187-199, doi:[https://doi.org/10.1016/0021-9991\(77\)90121-8](https://doi.org/10.1016/0021-9991(77)90121-8)  
736 (1977).
- 737 46 Hawkins, G. D., Cramer, C. J. & Truhlar, D. G. Pairwise solute descreening of  
738 solute charges from a dielectric medium. *Chemical Physics Letters* **246**, 122-  
739 129, doi:[https://doi.org/10.1016/0009-2614\(95\)01082-K](https://doi.org/10.1016/0009-2614(95)01082-K) (1995).
- 740 47 Miller, B. R. *et al.* MMPBSA.py: An Efficient Program for End-State Free  
741 Energy Calculations. *Journal of Chemical Theory and Computation* **8**, 3314-  
742 3321, doi:10.1021/ct300418h (2012).
- 743 48 Zhuo, S., Clemens, J. C., Hakes, D. J., Barford, D. & Dixon, J. E. Expression,  
744 purification, crystallization, and biochemical characterization of a recombinant

745 protein phosphatase. *The Journal of biological chemistry* **268**, 17754-17761  
746 (1993).  
747 49 Lorenz, U. Protein tyrosine phosphatase assays. *Curr Protoc Immunol* **Chapter**  
748 **11**, Unit-11.17, doi:10.1002/0471142735.im1107s93 (2011).  
749  
750

## Supplementary figures and tables

### An integrative approach unveils a distal encounter site for rPTP $\epsilon$ and phospho-Src complex formation

Nadendla EswarKumar, Cheng-Han Yang, Sunilkumar Tewary, Yi-Qi Yeh, Hsiao-Ching Yang, Meng-Chiao Ho

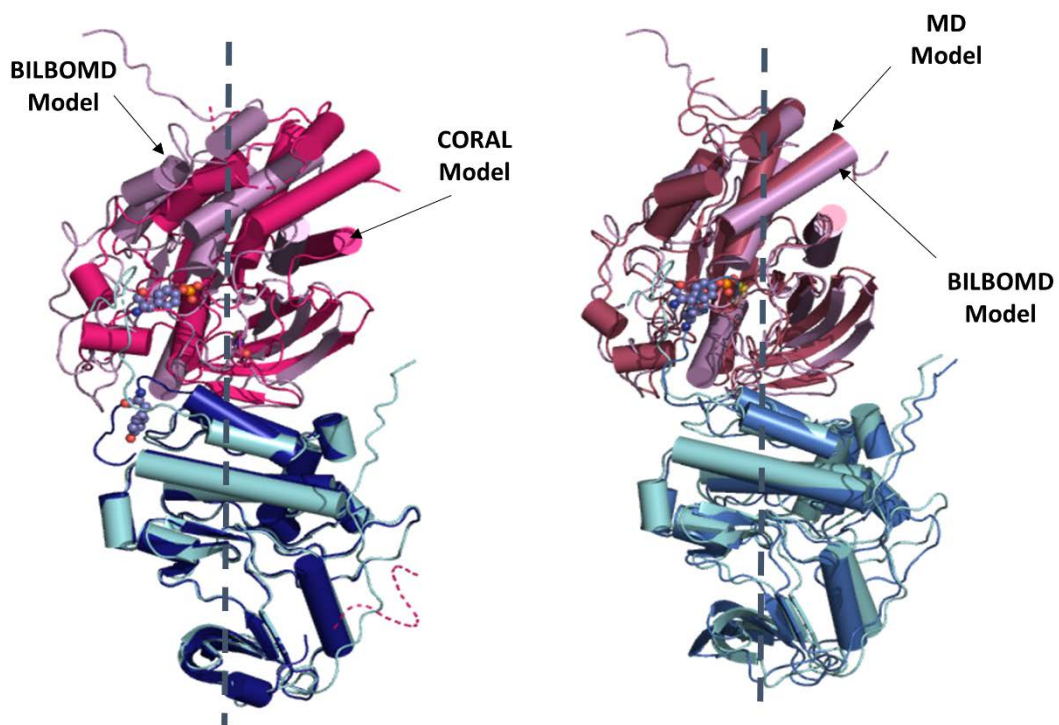

**Figure S1. Comparison of CORAL, BILBOMD and MD simulation model of rPTP $\epsilon$ D1: phospho-SrcKD complex.** The overlaid structures of CORAL and BILBOMD are shown on the left. The overlaid structures of BILBOMD and MD model are shown on the right.

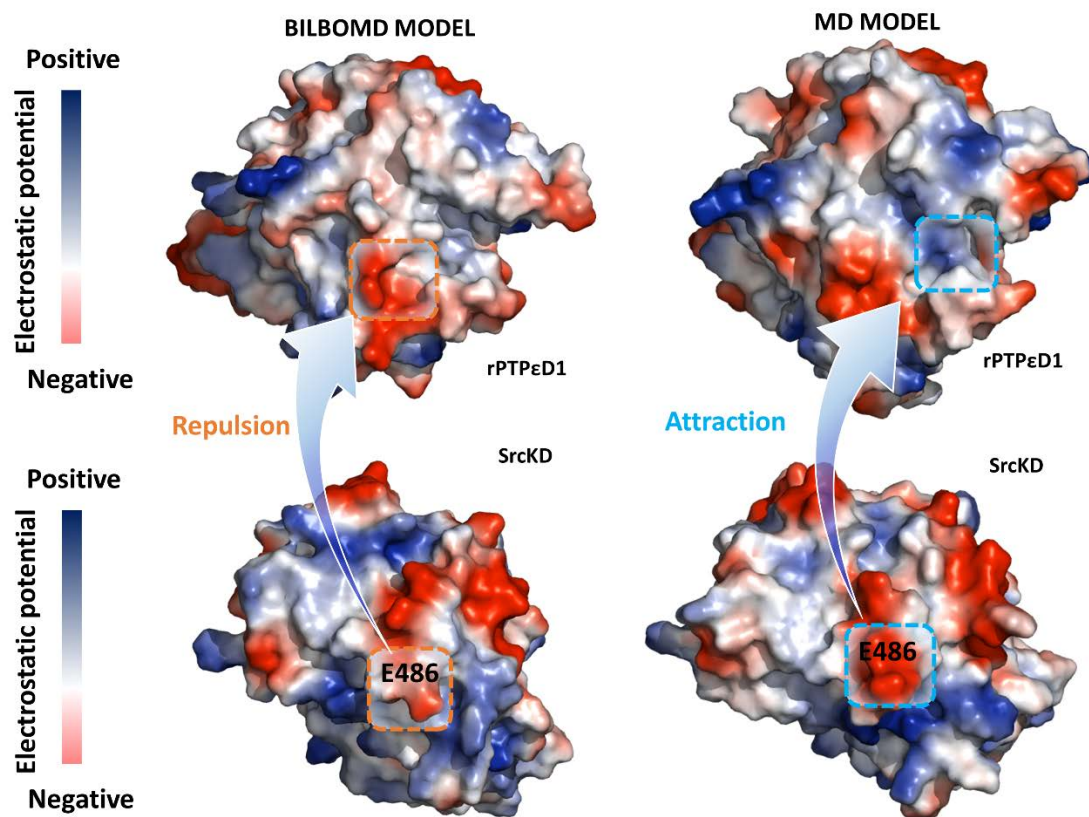

**Figure S2. The comparison of electrostatic potential surface focusing on encounter interface of rPTPεD1 and SrcKD between BILBOMD and final MD model.** The positive surface colored in blue and the negative surface colored in red. The repulsion region (orange square) and attractive region (blue square) show the interaction of the encounter surface between rPTPεD1 and SrcKD.



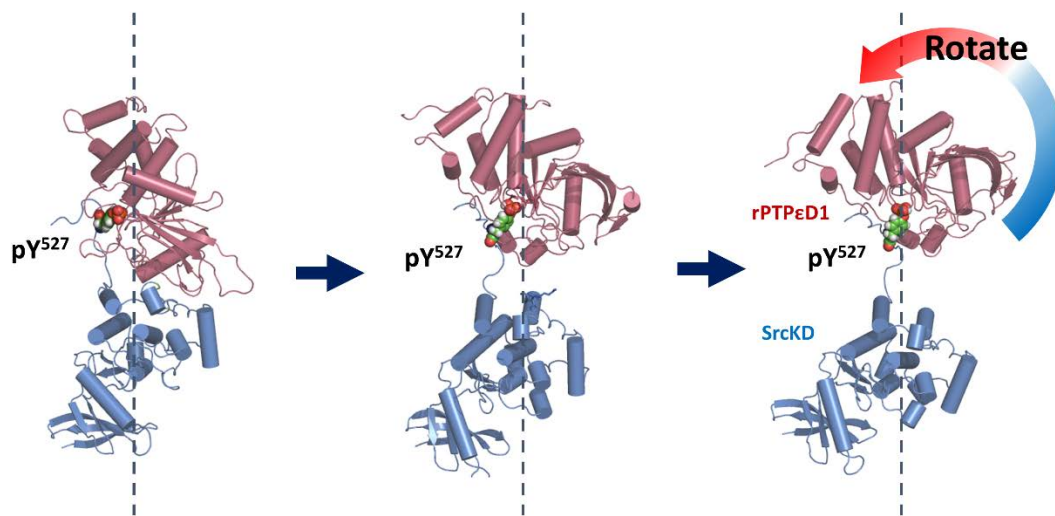

**Figure S3.** Illustration of how a strong interaction between pTyr 527 and rPTPεD1 causes unreasonable dissociation sampling. During dissociation trajectory, pTyr527 of SrcKD remains bound to the rPTPεD1 active site, causing the rotation of rPTPεD1.

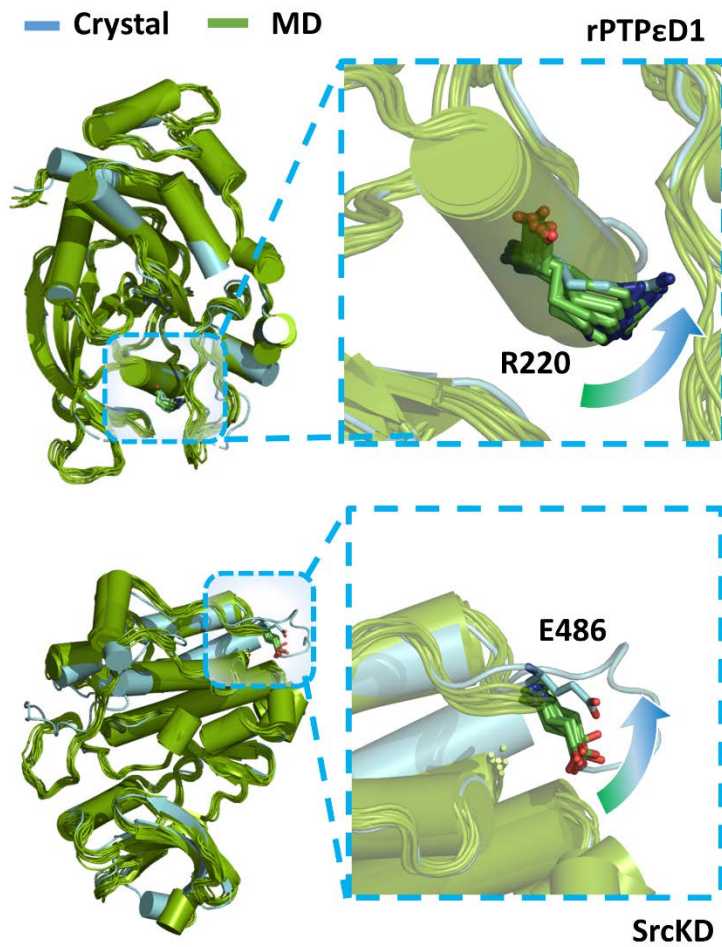

**Figure S4.** The schematic diagram displays the MD simulation trajectories of the unbound form of rPTPεD1 and Src.

| Protein                                        | rPTPεD1: SrcKD            | STDEV   |
|------------------------------------------------|---------------------------|---------|
| <b>Guinier</b>                                 |                           |         |
| I(0) (cm <sup>-1</sup> )                       | 0.044                     | 0.00001 |
| Rg (Å)                                         | 29.4                      | 0.27    |
| <b>Pair Distance Distribution Function</b>     |                           |         |
| D <sub>max</sub> (Å)                           | 100                       | -       |
| Rg <sub>real</sub> (Å)                         | 30.2                      | 0.114   |
| I(0) <sub>real</sub> (cm <sup>-1</sup> )       | 0.044                     | 0.0001  |
| Rg <sub>reciprocal</sub> (Å)                   | 30.2                      | -       |
| I(0) <sub>reciprocal</sub> (cm <sup>-1</sup> ) | 0.044                     | -       |
| <b>Fitting quality</b>                         |                           |         |
| χ <sup>2</sup> (Coral model)                   | 4.1                       | -       |
| χ <sup>2</sup> (BILBO model)                   | 2.4                       | -       |
| χ <sup>2</sup> (MD model)                      | 1.6                       | -       |
| <b>Porod volume (nm<sup>3</sup>)</b>           | 70.3                      | -       |
| <b>Instrument, Data reduction kit</b>          | 23A1 SWAXS, NSRRC, Taiwan |         |
| <b>Data process</b>                            | ATSAS 2.7.1 & foXS        |         |
| <b>Accession code</b>                          | SASDJ33                   |         |

**Table S1. SAXS data table and analysis parameters for rPTPεD1: cSrcKD complex**

|                        | MD-derived |       |         | BILBOMD |       |         | Experimental |
|------------------------|------------|-------|---------|---------|-------|---------|--------------|
|                        | rPTPε      | SrcKD | Complex | rPTPε   | SrcKD | Complex | Complex      |
| <b>Rg (Å)</b>          | 19.9       | 22.4  | 30.5    | 20.0    | 22.4  | 30.3    | 29.4         |
| <b>Minor (Å)</b>       | 17.3       | 19.6  | 21.2    | 17.9    | 21.1  | 20.5    | 20.7         |
| <b>Major (Å)</b>       | 15.6       | 19.6  | 23.3    | 16.1    | 19.0  | 22.6    | 22.8         |
| <b>n/m<sup>a</sup></b> | 0.9        | 1.0   | 1.1     | 0.9     | 0.9   | 1.1     | 1.1          |
| <b>Length (Å)</b>      | 56.5       | 64.2  | 91.3    | 56.9    | 64.9  | 91.1    | 90.7         |

<sup>a</sup>n/m is the major/minor axis of the elliptical cylinder model.

**Table S2. Comparison of the form factor characteristics of rPTPεD1, SrcKD and complex in the MD-derived model and rigid-body model**
